# Supplementary material for: An electrochemical sensor based on copper-based metal–organic framework-reduced graphene oxide composites for determination of 2,4-dichlorophenol in water
Source: Royal Society of Chemistry journal article supplement (doi:10.1039/d0ra06700h), 2020-01-01
Supplement: d0ra06700h1.pdf [file d0ra06700h1.pdf]

## An Electrochemical Sensor Based on Copper-Based Metal-Organic Frameworks- reduced Graphene Oxide composites for Determination of 2,4 – Dichlorophenol in Water

(Supplementary)

Manh B. Nguyen<sup>1+</sup>, Vu Thi Hong Nhung<sup>1+</sup>, Vu Thi Thu<sup>2\*</sup>, Dau Thi Ngoc Nga<sup>2</sup>, Thuan Nguyen Pham Truong<sup>3</sup>, Hoang Truong Giang<sup>2</sup>, Giang H. Le<sup>1</sup>, Pham Thi Hai Yen<sup>1</sup>, Pham Hong Phong<sup>1</sup>, Tuan A. Vu<sup>1</sup> and Vu Thi Thu Ha<sup>1,2\*</sup>

<sup>1</sup>Institute of Chemistry (IoC), Vietnam Academy of Science and Technology (VAST), 18 Hoang Quoc Viet, Cau Giay, Hanoi, Viet Nam.

<sup>2</sup>University of Science and Technology of Hanoi (USTH), Vietnam Academy of Science and Technology (VAST), 18 Hoang Quoc Viet, Cau Giay, Hanoi, Viet Nam.

<sup>3</sup>CY Cergy Paris University, LPPI, 5 mail Gay Lussac, F-95000, Cergy, France.

<sup>+</sup>These authors provided equal contribution to this work.

<sup>\*</sup>Corresponding author: Vu Thi Thu Ha, Vu Thi Thu

Email: [Havt@ich.vast.vn](mailto:Havt@ich.vast.vn); [thuvu.edu86@gmail.com](mailto:thuvu.edu86@gmail.com).

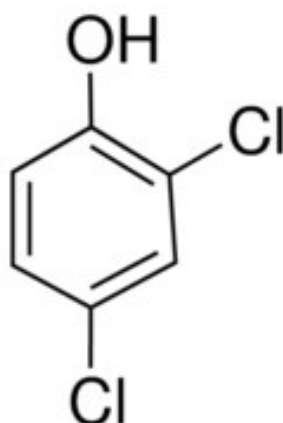

**Fig. 1S:** Structures of studied 2,4- dichlorophenol

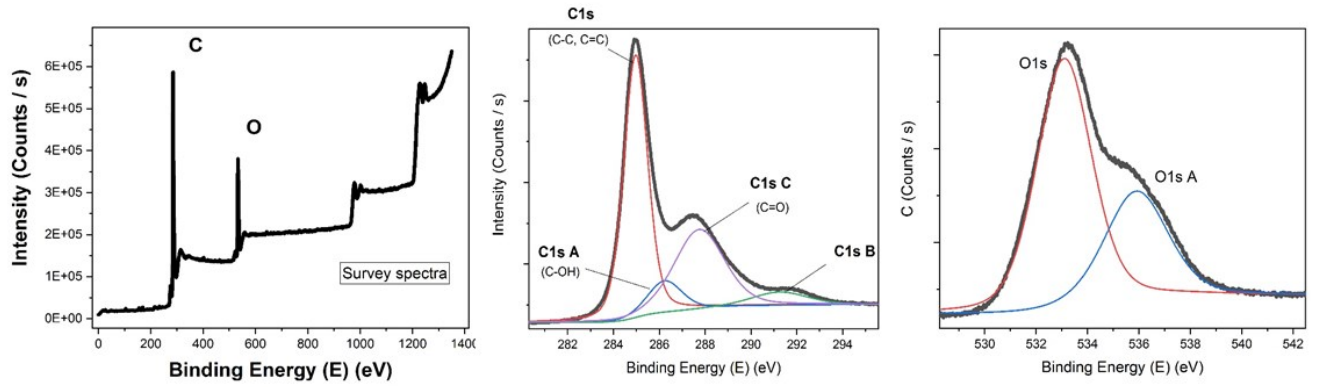

**Figure 2S:** XPS spectra recorded for pure GO

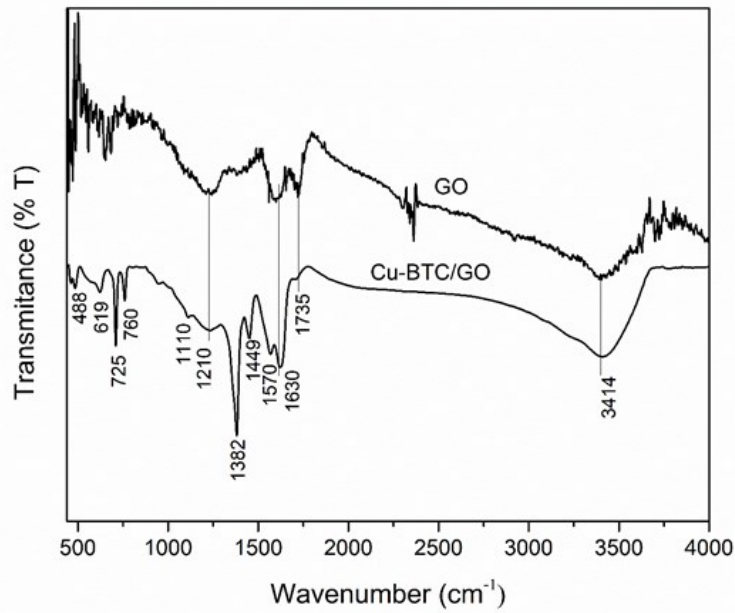

**Figure 3S:** FTIR spectrum of GO and Cu-BTC/GO

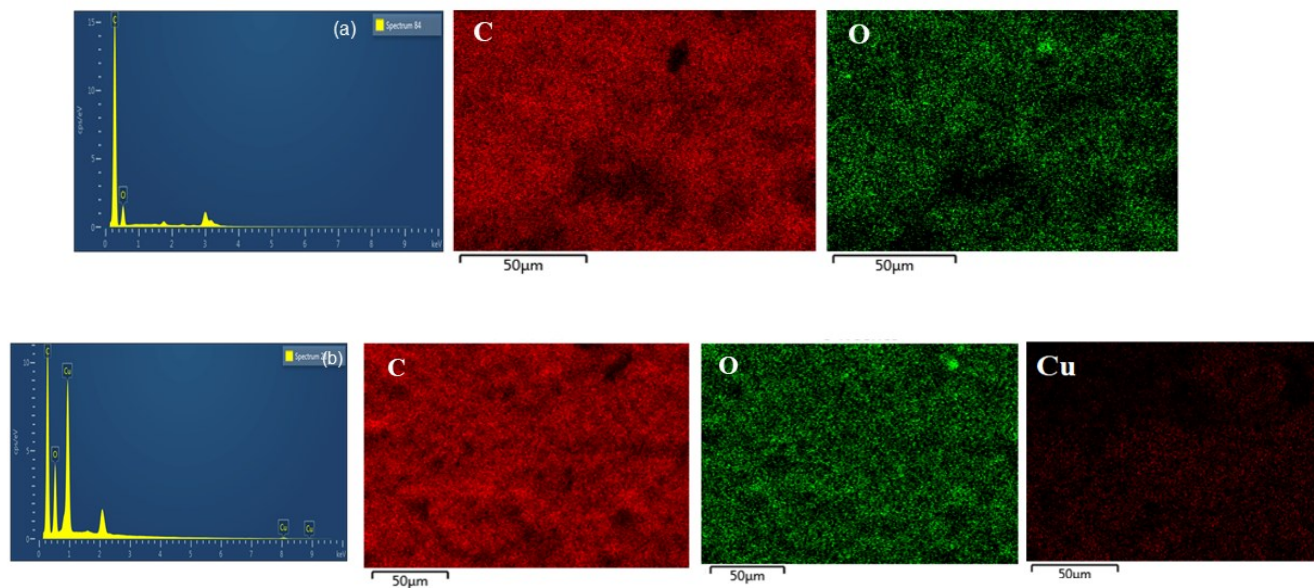

**Figure 4S:** EDX spectrum and EDX mapping image of GO (a) and of Cu-BTC/GO (b) samples

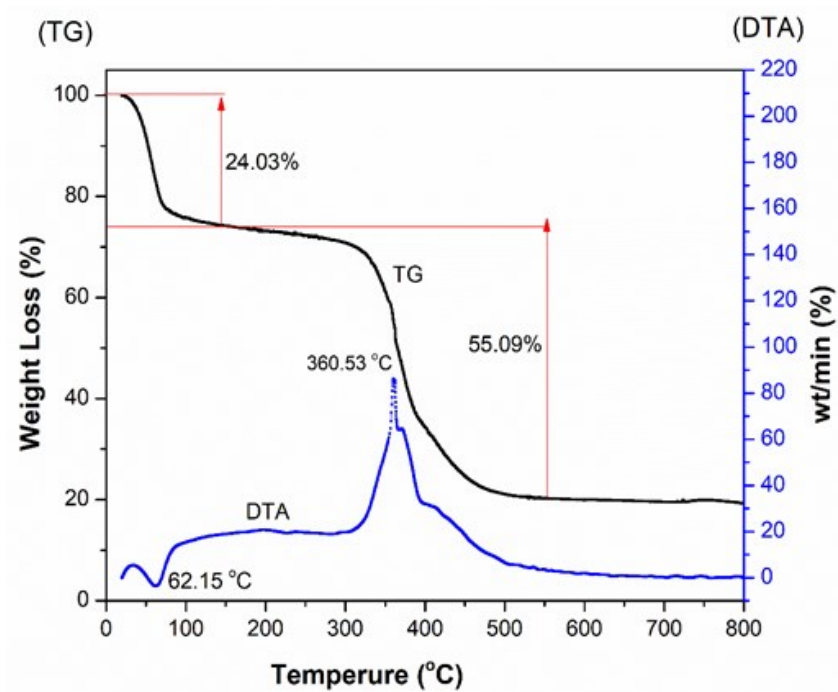

**Figure 5S:** TGA and DTA diagrams of Cu-BTC/GO sample

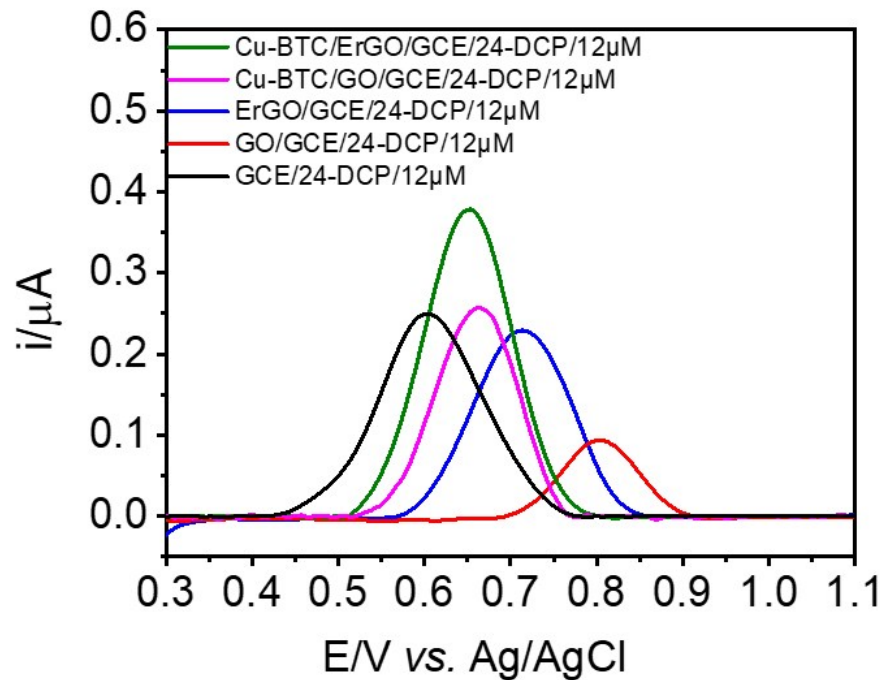

**Figure 6S:** DPVs of 12 μM of 2,4-DCP using different electrodes: bare GCE, GO/GCE, ErGO/GCE, Cu-BTC/GO/GCE and Cu-BTC/ErGO/GCE recorded in PBS, pH = 7 after baseline subtraction

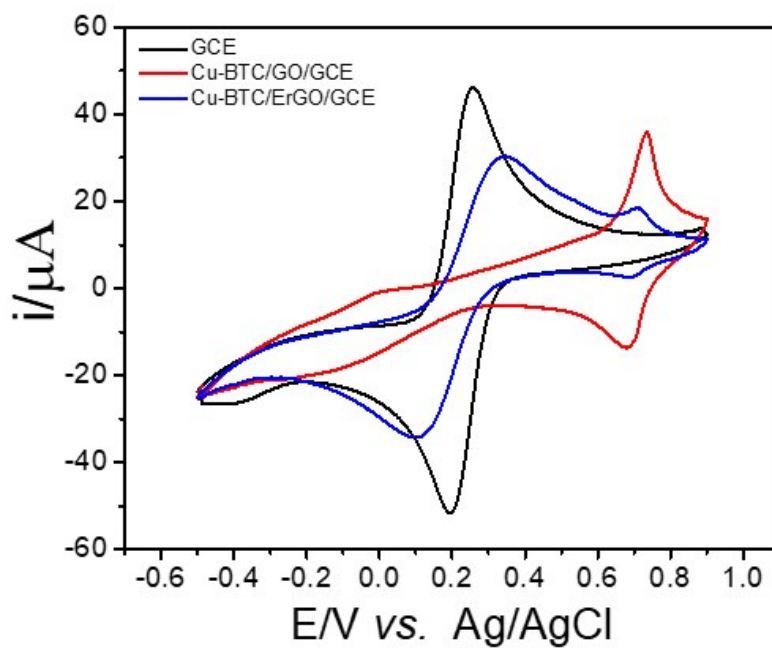

**Figure 7S:** CVs of bare GCE, Cu-BTC/GO/GCE and Cu-BTC/ErGO/GCE from - 0.5V - 0.9V in  $K_3Fe(CN)_6$  5mM/ PBS 0.1M, pH 7

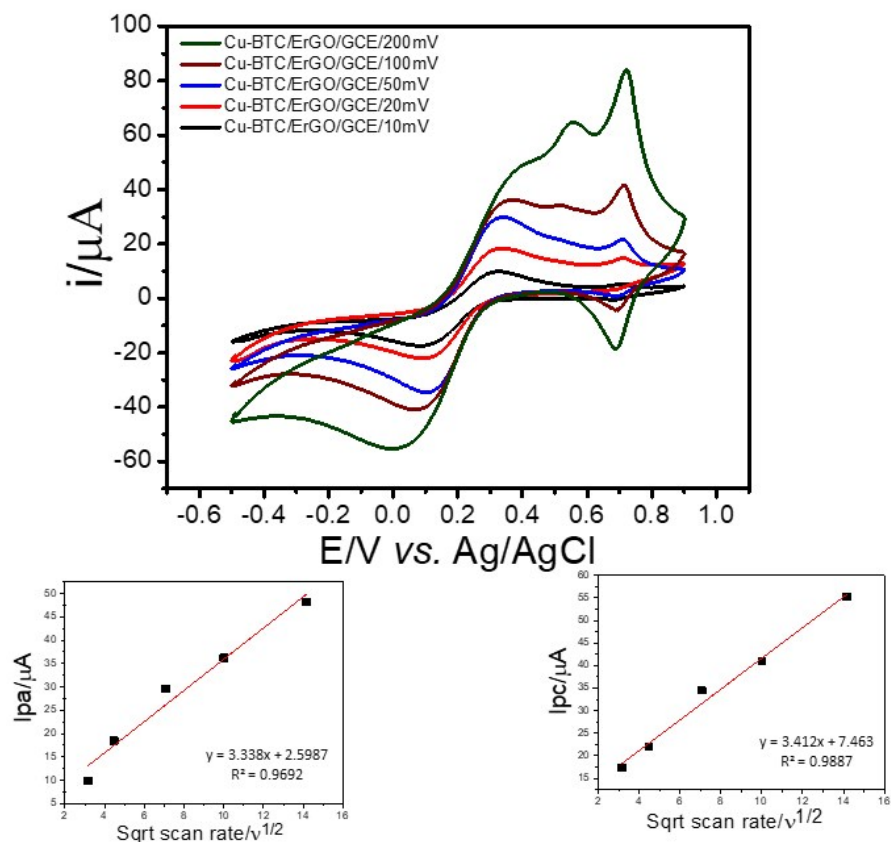

*Randle – Sevcik equation:*

$$I_p = (2.69 \times 10^5)n^{3/2}ACD^{1/2}v^{1/2}$$

*A* is the active surface area (ECSA)( $cm^2$ )

*D* is the diffusion coefficient of  $[K_3Fe(CN)_6]$  ( $6.605 \times 10^{-6} cm^2s^{-1}$ )

*n* = 1 is the number of transferred electrons for  $[Fe(CN)_6]^{3-/4-}$  redox couple

*C* is the bulk concentration of  $[K_3Fe(CN)_6]$  (5 mM)

**Figure 8S:** CVs of Cu-BTC/ErGO/GCE in 5mM  $K_3Fe(CN)_6/K_4Fe(CN)_6$  + 0.1M KCl at different scan rates and calculation of electroactive surface area (ECSA)

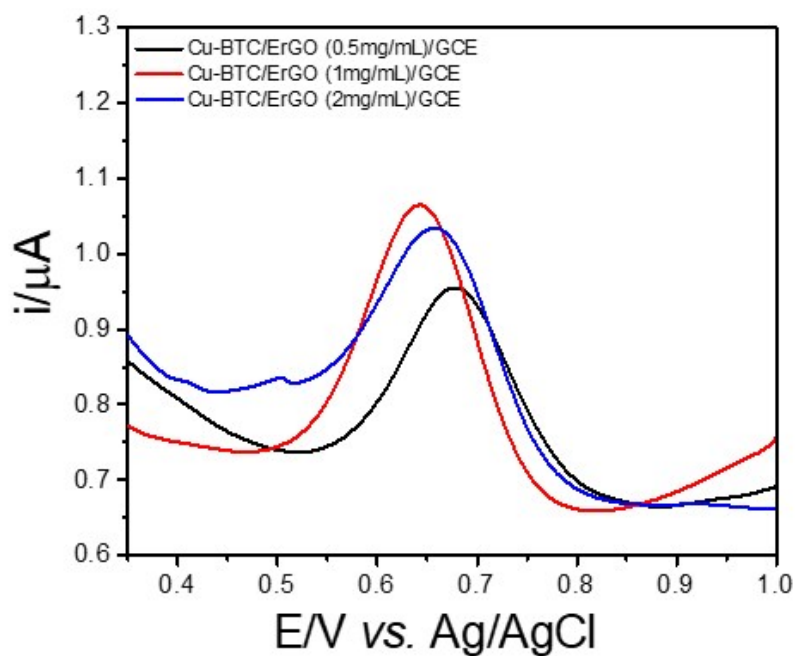

**Figure 9S:** Influence of content of Cu-BTC/ErGO/GCE used for modification on electrochemical signals of 2,4-DCP

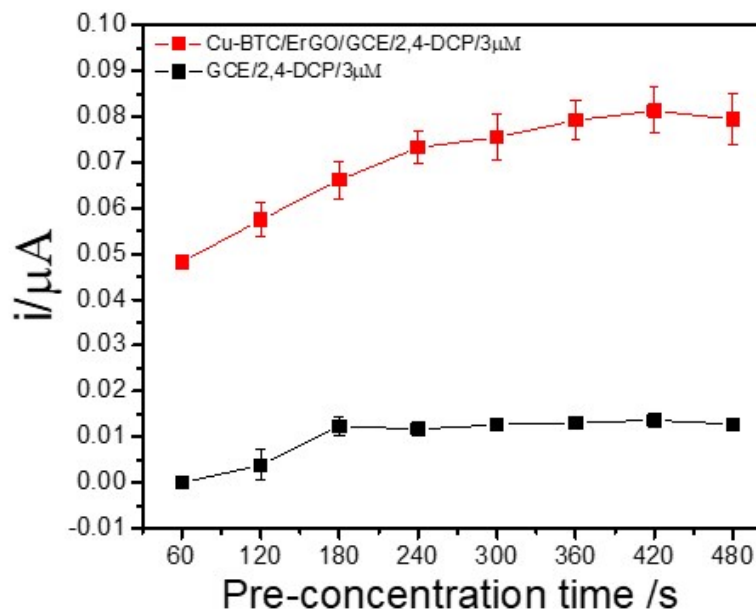

**Figure 10S:** Influence of accumulation time (60- 480 s) on DPV signals recorded in PBS solution (pH 7.0) containing of 2,4-DCP at concentration of 3  $\mu\text{M}$  on Cu-BTC/ErGO/GCE and bare GCE

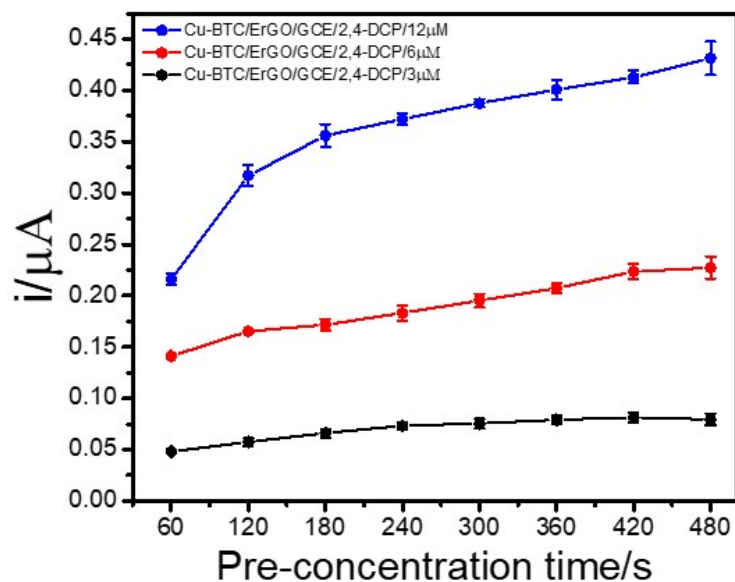

**Figure 11S:** Influence of accumulation time (60- 480 s) on DPV signals recorded in PBS solution (pH 7.0) containing of 2,4-DCP at concentration of 3  $\mu\text{M}$ , 6  $\mu\text{M}$ , 12 $\mu\text{M}$  on Cu-BTC/ErGO/GCE

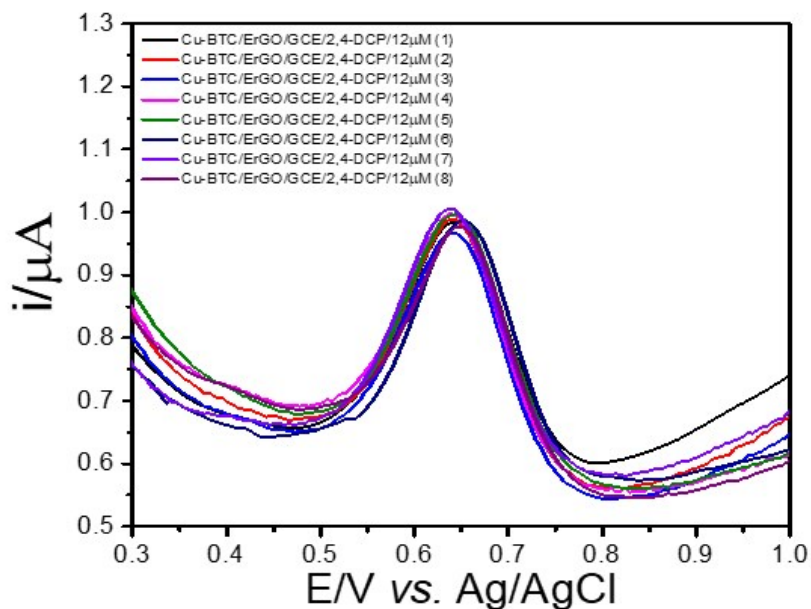

**Figure 12S:** Reproducibility of eight Cu-BTC/ErGO/GCE sensors at 12  $\mu\text{M}$  2,4-DCP in PBS pH

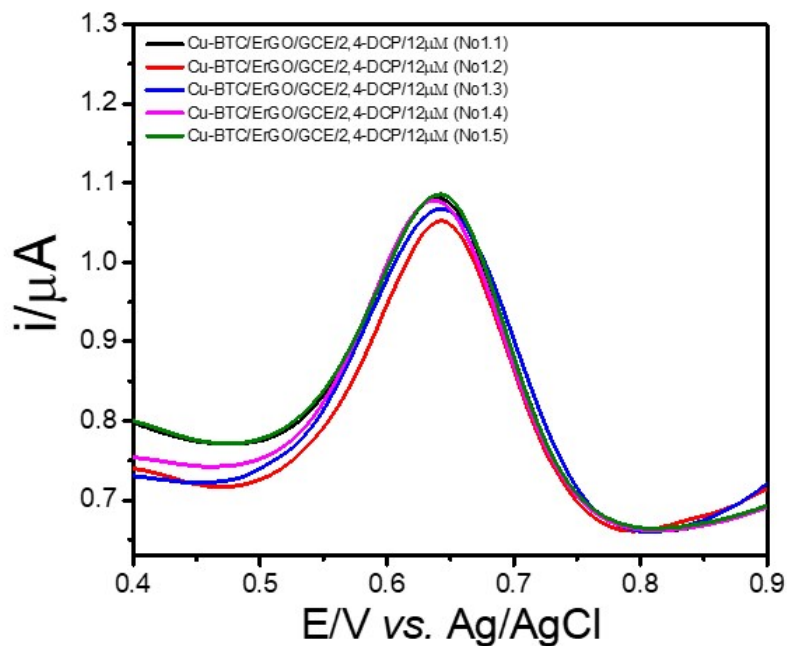

**Figure 13S:** Repeatability of 5 measurements using one Cu-BTC/ErGO/GCE sensor with 12  $\mu\text{M}$  2,4-DCP in PBS pH 7

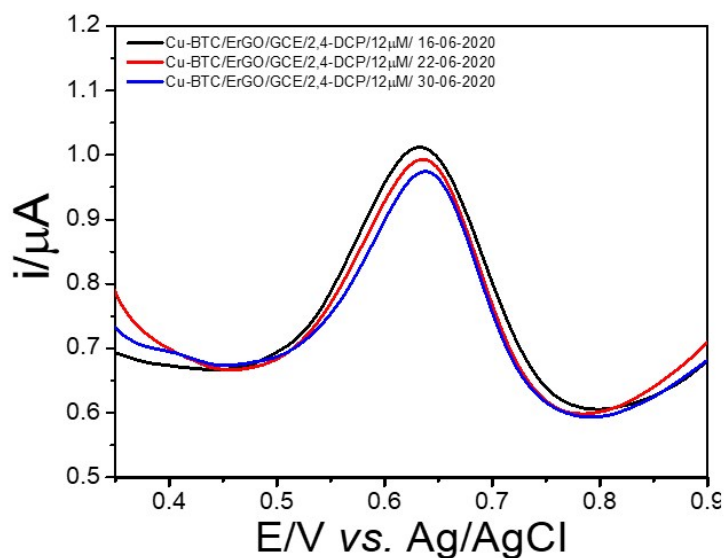

**Figure 14S:** DPASV response of Cu-BTC/ErGO/GCE for the detection of 2,4-DCP 12  $\mu\text{M}$  after 2 weeks.



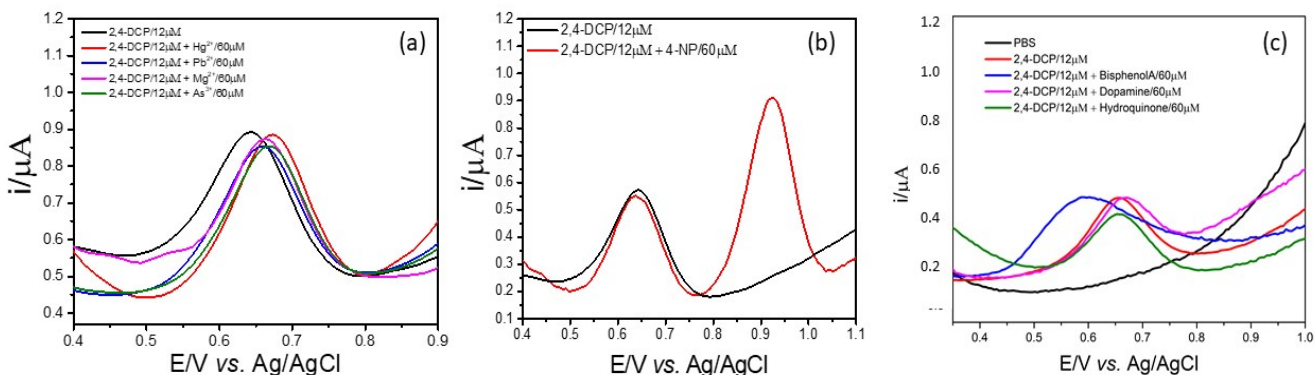

**Figure 15S:** Voltammograms of 2,4-DCP on Cu-BTC/ErGO/GCE before and after adding interferences at concentrations 5 times higher than that of analyte, 2,4-DCP with  $\text{Hg}^{2+}$ ,  $\text{Pb}^{2+}$ ,  $\text{Mn}^{2+}$  and  $\text{As}^{3+}$  (a) with 4-nitrophenol (b) and bisphenol A, hydroquinone, dopamine (c)

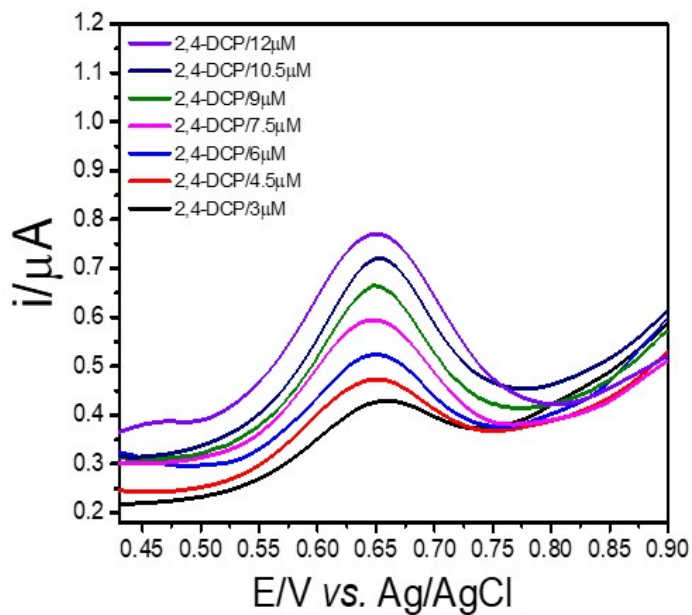

**Figure 16S:** Voltammograms of lake water spiked 2,4-DCP at different concentrations recorded on Cu-BTC/ErGO/GCE sensor
